# Supplementary material
Source: MDPI journal article supplement (https://www.mdpi.com/2077-0472/9/11/239)
Supplement: s1 [file s1]

# An Economic Analysis of Vermi Compost on MV Paddy Production in Bangladesh: A Case Study of Jessore District

Department of Economics, East West University, Dhaka, Bangladesh

Sample No.: .....

Date of Interview:.....

**1. General Information of the Farmer:**

Name:.....

Village: .....

Thana:..... Education Level:.....Years

**2. Main Occupation of the Farmer:.....**

Subsidiary Occupation (If any):.....

Working Hours/Day:..... Income from off-farm:.....Tk

3. Family size:..... (i) Dependent:.....(ii) Independent:.....

**4. Land Area Under the Farm:**

| Own land (Bigha) | Rented in (Bigha) | Rented out (Bigha) | Homestead (Bigha) |
|------------------|-------------------|--------------------|-------------------|
|                  |                   |                    |                   |

**A. Information of Boro Paddy (MV);**

**Cultivation Time.....**

**5. Irrigation and Pesticides Costs:**

**Variety name of paddy:.....**

Sources of irrigation: (1) Deep tubewell (2) shallow tubewell ;

(3) Irrigation price: .....Taka/bigha (4) Number of irrigation.....

(5) Pesticides .....taka (6) Number of application.....

(7) Others.....

**6. Number of Permanent & Hired labors Employed in the Rice/Paddy Production:**

(1) Family member: (i) Male (No.) ..... (ii) Female (No.)..... (iii) Child.....

(2) Permanent hired labor: (i) Male (ii) Wage rate .....taka per month/year

**7. Power use for land preparation:**

| Type of plow  | Taka | Type of plow | Taka | Type of plow | Taka |  |
|---------------|------|--------------|------|--------------|------|--|
| Country       |      | Power tiller |      | Tractor      |      |  |
| Plow/ Bullock |      |              |      |              |      |  |

**9. Input used for paddy/rice production**

|             | Quantity (Kg) | Taka/Kg |               | Quantity (Kg) | Taka/Kg |
|-------------|---------------|---------|---------------|---------------|---------|
| Seeds/      |               |         | Fertilizer    |               |         |
| Seedlings   |               |         | Urea          |               |         |
| Ashes (md)  |               |         | TSP           |               |         |
| Manure (md) |               |         | MP            |               |         |
|             |               |         | Gypsum        |               |         |
|             |               |         | Vermi compost |               |         |

**9. Labour Cost of Rice/Paddy Production:**

| Cost Items                                                                 | Hired labor (Number) |        |          | Family supply |        |          |
|----------------------------------------------------------------------------|----------------------|--------|----------|---------------|--------|----------|
|                                                                            | Male                 | Female | Children | Male          | Female | Children |
| Land Preparation                                                           |                      |        |          |               |        |          |
| Seedbed Preparation                                                        |                      |        |          |               |        |          |
| Uprooting and Planting                                                     |                      |        |          |               |        |          |
| Irrigation                                                                 |                      |        |          |               |        |          |
| Pesticides                                                                 |                      |        |          |               |        |          |
| Weeding                                                                    |                      |        |          |               |        |          |
| Fertilizing                                                                |                      |        |          |               |        |          |
| Manuring                                                                   |                      |        |          |               |        |          |
| Harvesting & Carrying                                                      |                      |        |          |               |        |          |
| Threshing & Drying                                                         |                      |        |          |               |        |          |
| Storing                                                                    |                      |        |          |               |        |          |
| Others                                                                     |                      |        |          |               |        |          |
| Wage rate:                                                                 |                      |        |          |               |        |          |
| (i) Male.....taka/day (ii) Female.....taka/day (iii) Children.....taka/day |                      |        |          |               |        |          |

**10. Boro Rice/Paddy:**

| Items              | Amount (Mound.) | Mound/Taka | Total Amount (Tk) |
|--------------------|-----------------|------------|-------------------|
| Product            |                 |            |                   |
| By-product (straw) |                 |            |                   |

**B. Information of Aman Paddy;**

**Cultivation time:.....**

**11. Irrigation and Pesticides Costs:**

Variety name of paddy:.....

|                                                                 |                               |
|-----------------------------------------------------------------|-------------------------------|
| Sources of irrigation: (1) Deep tubewell (2) shallow tubewell ; |                               |
| (3) Irrigation price: .....Taka/bigha                           | (4) Number of irrigation..... |
| (5) Pesticides .....taka                                        | (6) Number of application     |
| (7) Others.....                                                 |                               |

**12. Number of Permanent & Hired labors Employed in the Rice/Paddy Production:**

(1) Family member: (i) Male (No.) ..... (ii) Female (No.)..... (iii) Child.....

(2) Permanent hired labor: (i) Male (ii) Wage rate .....taka per month/year

**13. Power use for land preparation:**

| Type of plow          | Taka | Type of plow | Taka | Type of plow | Taka |
|-----------------------|------|--------------|------|--------------|------|
| Country plow/ Bullock |      | Power tiller |      | Tractor      |      |

**14. Input used for paddy/rice production**

|             | Quantity (Kg) | Taka/Kg |               | Quantity (Kg) | Taka/Kg |
|-------------|---------------|---------|---------------|---------------|---------|
| Seeds/      |               |         | Fertilizer    |               |         |
| Seedlings   |               |         | Urea          |               |         |
| Ashes (md)  |               |         | TSP           |               |         |
| Manure (md) |               |         | MP            |               |         |
|             |               |         | Gypsum        |               |         |
|             |               |         | Vermi compost |               |         |

**15. Labour Cost of Rice/Paddy Production:**

| Cost Items             | Hired labor (Number) |        |          | Family supply (Number) |        |          |
|------------------------|----------------------|--------|----------|------------------------|--------|----------|
|                        | Male                 | Female | Children | Male                   | Female | Children |
| Land Preparation       |                      |        |          |                        |        |          |
| Seedbed Preparation    |                      |        |          |                        |        |          |
| Uprooting and Planting |                      |        |          |                        |        |          |
| Irrigation             |                      |        |          |                        |        |          |

| Cost Items                                                                 | Hired labor (Number) |        |          | Family supply (Number) |        |          |
|----------------------------------------------------------------------------|----------------------|--------|----------|------------------------|--------|----------|
|                                                                            | Male                 | Female | Children | Male                   | Female | Children |
| Pesticides                                                                 |                      |        |          |                        |        |          |
| Weeding                                                                    |                      |        |          |                        |        |          |
| Fertilizing                                                                |                      |        |          |                        |        |          |
| Manuring                                                                   |                      |        |          |                        |        |          |
| Harvesting & Carrying                                                      |                      |        |          |                        |        |          |
| Threshing & Drying                                                         |                      |        |          |                        |        |          |
| Storing                                                                    |                      |        |          |                        |        |          |
| Others                                                                     |                      |        |          |                        |        |          |
| Wage rate:                                                                 |                      |        |          |                        |        |          |
| (i) Male.....taka/day (ii) Female.....taka/day (iii) Children.....taka/day |                      |        |          |                        |        |          |

| 16. Aman Rice/Paddy: |                 |            |                   |
|----------------------|-----------------|------------|-------------------|
| Items                | Amount (Mound.) | Mound/Taka | Total Amount (Tk) |
| Product              |                 |            |                   |
| By-product (Straw)   |                 |            |                   |

**17. Costs and Returns from Homestead Gardening:**

|                 |           |              |      |
|-----------------|-----------|--------------|------|
| Vegetables..... | Cost/taka | Return ..... | Taka |
| Fruits.....     | Cost/taka | Return.....  | Taka |

**18. Costs and Returns from Livestock, poultry and Ducks:**

| Types   | No. | Cost | Return | Types   | No. | Cost | Return |
|---------|-----|------|--------|---------|-----|------|--------|
| Cows    |     |      |        | Poultry |     |      |        |
| Bull/ox |     |      |        | Ducks   |     |      |        |
| Goat    |     |      |        | Others  |     |      |        |

**19. Other Incomes:**

(i) Off-farm income (Taka / year).....

(ii) Agricultural wage income (Taka/year):.....
